# Supplementary material for: Polyaniline nanowhiskers induced low methanol permeability and high membrane selectivity in partially sulfonated PVdF-co-HFP membranes
Source: Royal Society of Chemistry journal article supplement (doi:10.1039/c6ra24090a), 2016-01-01
Supplement: c6ra24090a1.pdf [file c6ra24090a1.pdf]

## Supplementary Information

Polyaniline nanowhiskers induced low methanol permeability and high membrane selectivity of partially sulfonated PVdF-*co*-HFP membranes

Kingshuk Dutta,<sup>a</sup> Suparna Das,<sup>a</sup> Patit P. Kundu<sup>a,b,\*</sup>

<sup>a</sup>Advanced Polymer Laboratory, Department of Polymer Science & Technology, University of Calcutta, 92, A. P. C. Road, Kolkata – 700 009, India.

<sup>b</sup>Department of Chemical Engineering, Indian Institute of Technology, Roorkee - 247667, India.

SCHEME

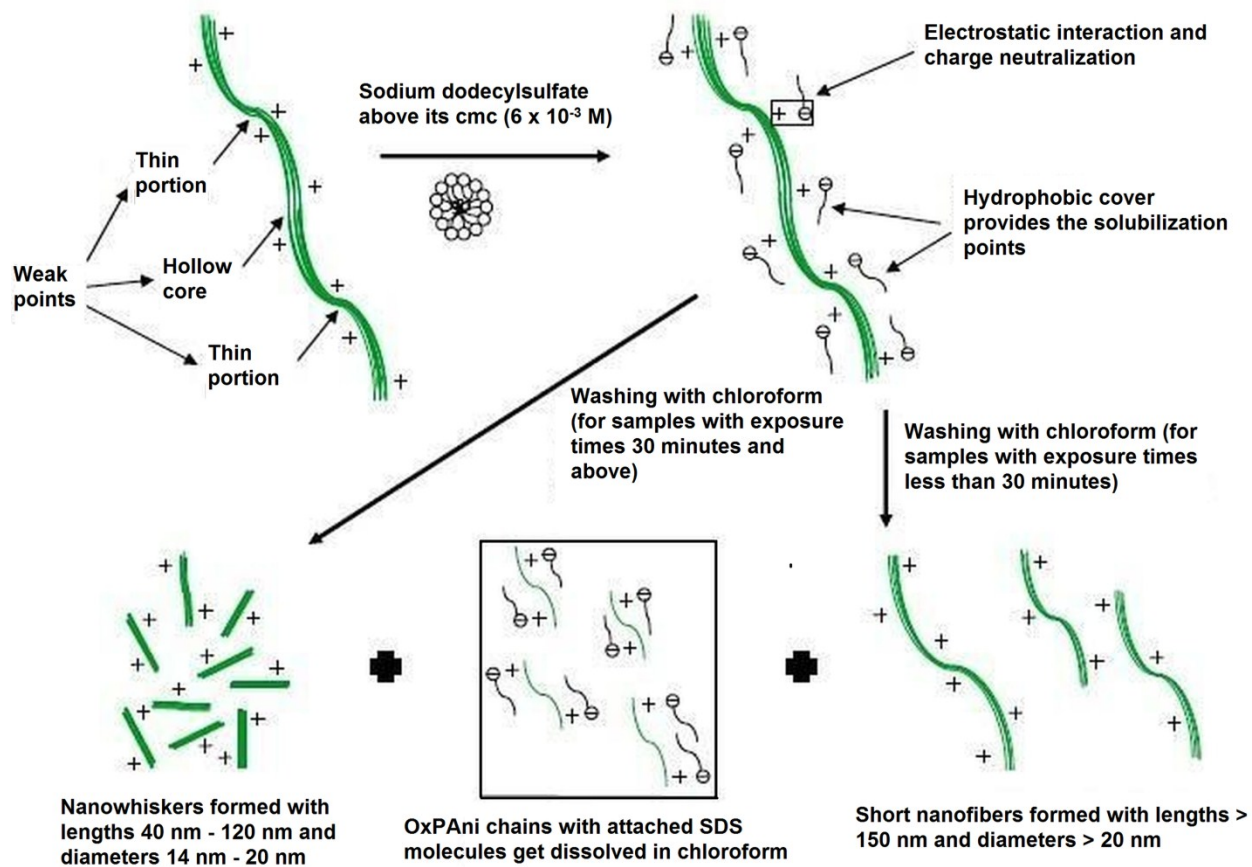

**Scheme S1** A schematic representation of the proposed mechanism involved in the reduction of OxPANI NFs' length, diameter, and aspect ratio upon treatment with SDS and chloroform.

FIGURES

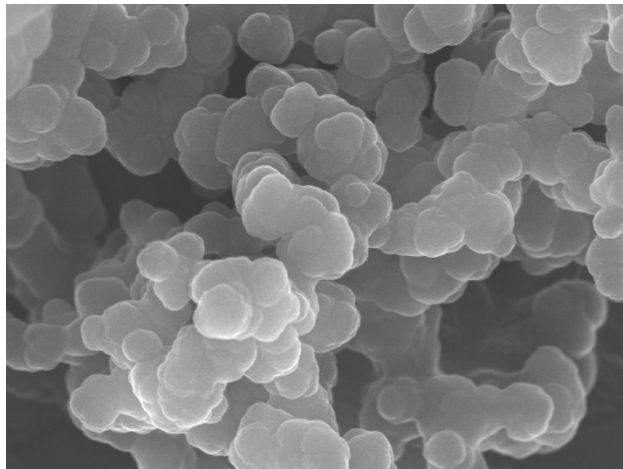

**Fig. S1** SEM micrograph of the OxPAni granules. (Scale bar: 100 nm, Magnification: 50000x)

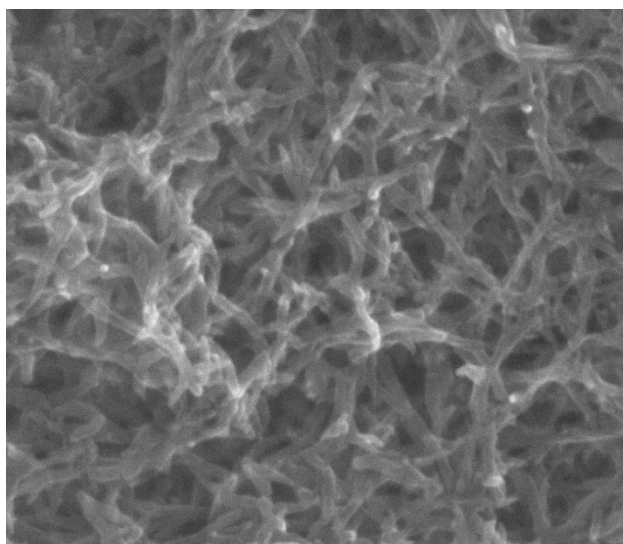

**Fig. S2** SEM micrograph of the interfacially synthesized OxPAni NFs. (Scale bar: 100 nm, Magnification: 50000x)

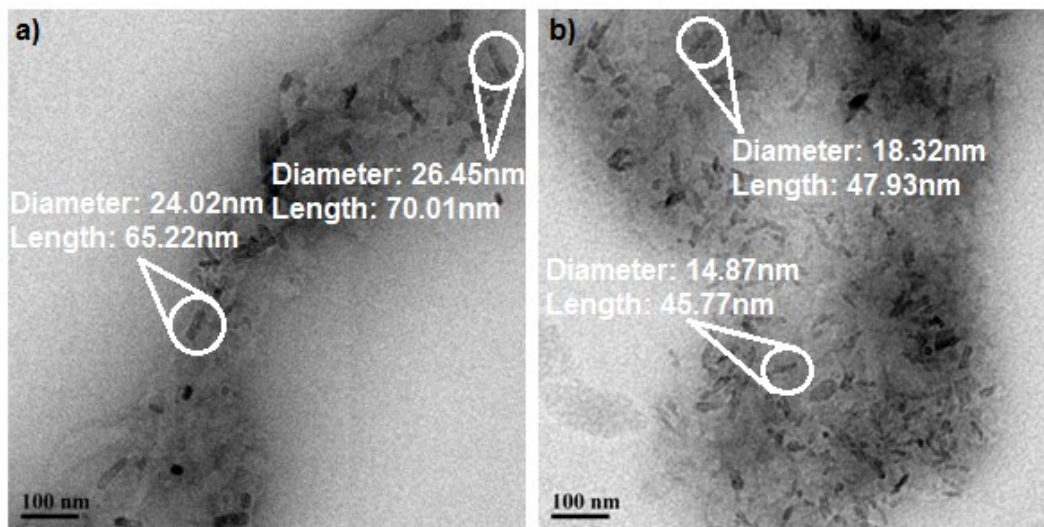

**Fig. S3** TEM micrographs of the OxPani NFs after (a) 50 min and (b) 70 min exposure to SDBS. Results comparable to SDS were obtained.

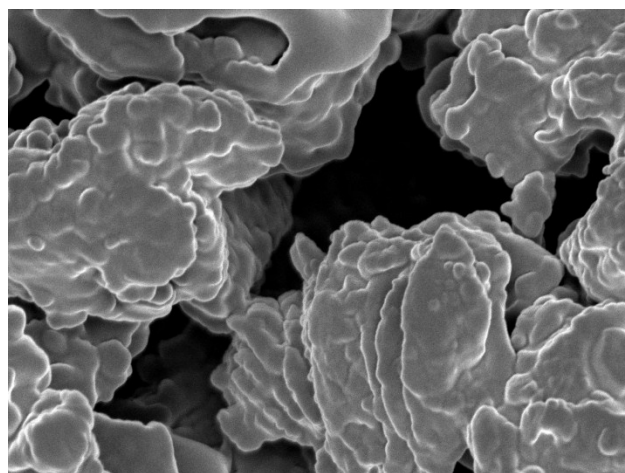

**Fig. S4** SEM micrograph of the pristine Nafion-117 membrane [12]. (Scale bar: 100 nm, Magnification: 30000x)

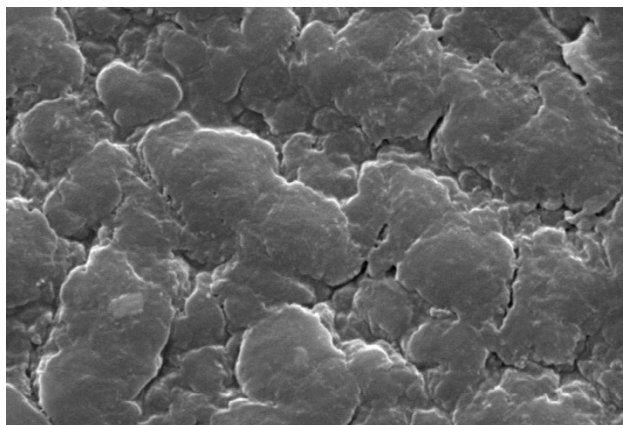

**Fig. S5** SEM micrograph of the pristine SPVdF-*co*-HFP membrane [12]. (Scale bar: 100 nm, Magnification: 30000x)

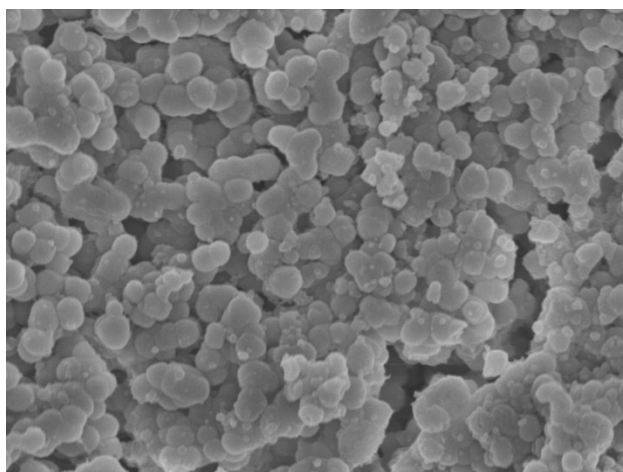

**Fig. S6** SEM micrograph of the SPVHP(G) membrane. (Scale bar: 100 nm, Magnification: 50000x)

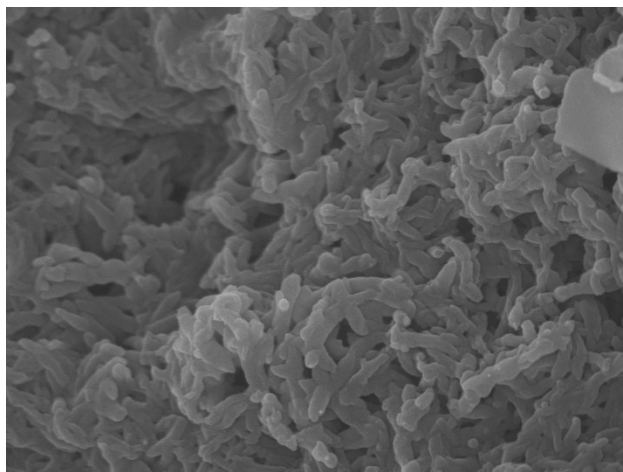

**Fig. S7** SEM micrograph of the SPVHP0 membrane. (Scale bar: 100 nm, Magnification: 50000x)

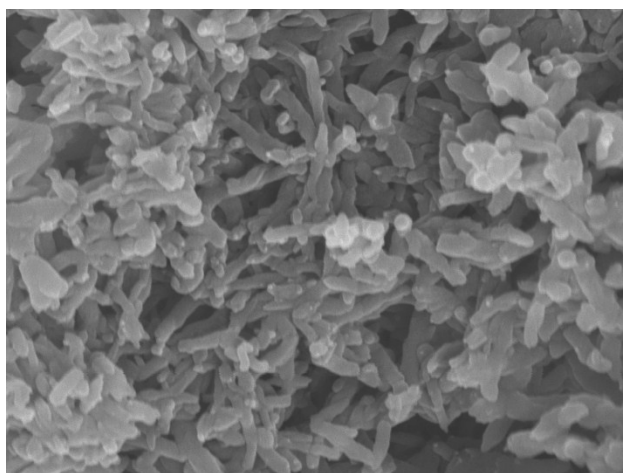

**Fig. S8** SEM micrograph of the SPVHP30 membrane. (Scale bar: 100 nm, Magnification: 50000x)

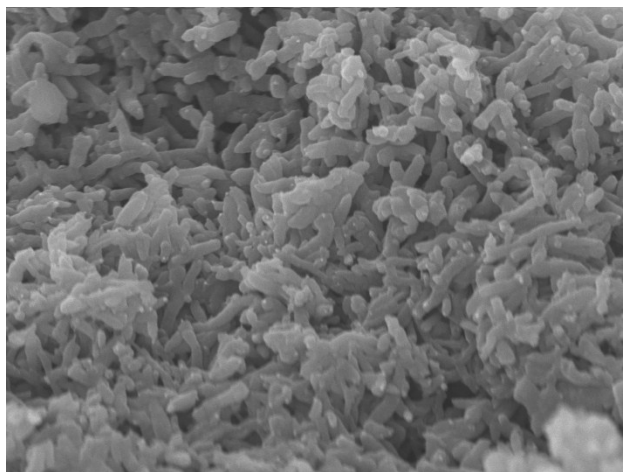

**Fig. S9** SEM micrograph of the SPVHP70 membrane. (Scale bar: 100 nm, Magnification: 50000x)
